# Supplementary material
Source: PubMed Central journal article supplement (PMC4135855)
Supplement: AAC.03039-14_zac009143230so1.pdf [file AAC.03039-14_zac009143230so1.pdf]

1 **TABLE S1** *C. jejuni* and *C. coli* isolates screened for *erm*(B) in this study

| Year of isolation                                                      | 2001    |   | 2007  |       | 2008     |    |         | 2009     |     |    | 2011     |          | 2012     |     |         |           |                |   |
|------------------------------------------------------------------------|---------|---|-------|-------|----------|----|---------|----------|-----|----|----------|----------|----------|-----|---------|-----------|----------------|---|
| Province/city of isolation                                             | Beijing |   | Jilin | Henan | Shandong |    | Ningxia | Shandong |     |    | Shandong | Shanghai | Shandong |     | Ningxia | Guangdong |                |   |
| Host <sup>b</sup>                                                      | H       |   | H     | H     | S        | C  | S       | S        | C   | D  | CC       | H        | S        | D   | S       | C         | S              | C |
| No. of <i>C. coli</i>                                                  | 5       | 1 | 3     | 94    | 18       | 95 | 133     | 36       | 27  | 18 | 66       | 68       | 89       | 209 | 17      | 184       | 94             |   |
| No. of <i>C. jejuni</i>                                                | 0       | 0 | 0     | 0     | 69       | 2  | 0       | 149      | 93  | 12 | 0        | 0        | 18       | 3   | 16      | 1         | 34             |   |
| Total No. of <i>Campylobacter</i>                                      | 5       | 1 | 3     | 94    | 87       | 97 | 133     | 185      | 120 | 30 | 66       | 68       | 107      | 212 | 33      | 185       | 128            |   |
| No. of <i>erm</i> (B)-positive isolates                                | 0       | 0 | 1     | 0     | 1        | 1  | 1       | 0        | 1   | 12 | 9        | 8        | 1        | 4   | 0       | 18        | 1 <sup>a</sup> |   |
| Total No. of <i>erm</i> (B)-positive <i>Campylobacter</i> in each year | 0       |   | 1     |       |          | 2  |         |          | 2   |    | 21       |          |          |     |         | 32        |                |   |

2 <sup>a</sup> This is the *C. jejuni* isolate C179b that carries *erm*(B) and all other *erm*(B)-positive isolates are *C. coli*.

3 <sup>b</sup> The abbreviations for host species represent swine (S), chicken (C), duck (D), chicken carcasses (CC), and human (H).

4

5 **TABLE S2** The percentage of *erm*(B)-positive *Campylobacter* isolates in each of the sources

| Source                                                      | Swine | Chicken | Duck | Chicken carcasses | Human |
|-------------------------------------------------------------|-------|---------|------|-------------------|-------|
| No. of <i>C. coli</i>                                       | 783   | 165     | 116  | 18                | 75    |
| No. of <i>C. jejuni</i>                                     | 6     | 268     | 111  | 12                | 0     |
| Total No. of <i>Campylobacter</i>                           | 789   | 433     | 227  | 30                | 75    |
| <i>erm</i> (B)-positive isolates                            | 32    | 2       | 2    | 12                | 10    |
| <i>erm</i> (B)-positive isolates/total <i>Campylobacter</i> | 4.1%  | 0.5%    | 0.9% | 40.0%             | 13.3% |

6 **TABLE S3** Annotation of ORFs in the MDRGIs

| Gene             | Size (bp) | G+C content (%) | Length (aa) <sup>a</sup> | Length (aa) <sup>b</sup> | %Identity/%positive (no. of aa) | Annotation and accession no.                                                                           |
|------------------|-----------|-----------------|--------------------------|--------------------------|---------------------------------|--------------------------------------------------------------------------------------------------------|
| <i>aac</i>       | 366       | 24.9            | 121                      | 121                      | 100/100 (121)                   | Acetyltransferase, <i>Enterococcus faecalis</i> T2; ZP_05426921                                        |
| <i>aacA-aphD</i> | 1440      | 24.6-24.7       | 479                      | 479                      | 99-100/99-100 (479)             | Bifunctional aminoglycoside modifying enzyme AacA-AphD, <i>Staphylococcus aureus</i> ; NP_863643       |
| <i>orf1</i>      | 117       | 19.7            | 41                       | 38                       | 100/100 (38)                    | Hypothetical protein HMPREF1327_01382, partial, <i>Enterococcus faecalis</i> 599; AFJ97256             |
| <i>aadE</i>      | 702       | 37.6            | 233                      | 233                      | 100/100 (233)                   | Streptomycin aminoglycoside 6-adenyltransferase, <i>Enterococcus faecalis</i> D6; ZP_05581297          |
| <i>sat4</i>      | 531       | 37.9            | 176                      | 176                      | 100/100 (176)                   | Streptothricin acetyltransferase, <i>Enterococcus faecium</i> ; ZP_05674679                            |
| <i>aphA-3</i>    | 795       | 44.9            | 264                      | 264                      | 100/100 (264)                   | Aminoglycoside phosphotransferase type III, <i>Enterococcus faecalis</i> ; YP_783930                   |
| <i>orf2</i>      | 675       | 44.1            | 224                      | 224                      | 99/100 (224)                    | Hypothetical protein BSEG_01714, <i>Bacteroides dorei</i> 5_1_36, D4; ZP_08793206                      |
| <i>orf3</i>      | 453       | 41.3            | 150                      | 150                      | 99/99 (150)                     | Hypothetical protein BSEG_01714, <i>Bacteroides dorei</i> 5_1_36, D4; ZP_08793207                      |
| <i>Δpcp</i>      | 303       | 51.2            | 139                      | 100                      | 100/100 (100)                   | Pyrrolidone carboxylate peptidase, <i>Bacteroides</i> sp. 9_1_42FAA; ZP_04541315                       |
| <i>orf4</i>      | 429       | 31.7            | 132                      | 142                      | 95/97 (120)                     | Hypothetical protein, <i>Streptococcus suis</i> ; CBZ42064                                             |
| <i>orf7</i>      | 420       | 39.6-39.8       | 139                      | 139                      | 96-97/99-100 (139)              | Conserved hypothetical protein, <i>Clostridium difficile</i> NAP08; ZP_06892641                        |
| <i>erm(B)</i>    | 738       | 33.1            | 245                      | 245                      | 100/100 (245)                   | rRNA adenine N-6-methyltransferase, <i>Streptococcus suis</i> BM407; YP_003028697                      |
| <i>Ω</i>         | 216       | 36.1            | 71                       | 71                       | 97/100 (71)                     | Omega, transcriptional repressor, <i>Streptococcus agalactiae</i> MRI Z1-211; ZP_22245542              |
| <i>ε</i>         | 288       | 28.5            | 90                       | 95                       | 99/100 (90)                     | Antidote of epsilon-zeta postsegregational killing system, <i>Streptococcus pyogenes</i> ; YP_232758   |
| <i>aadE</i>      | 867       | 35.3-35.5       | 288                      | 288                      | 99-100/99-100 (288)             | Putative adenylyltransferase, <i>Pediococcus acidilactici</i> ; YP_001965484                           |
| <i>orf6</i>      | 516       | 58.9            | 166                      | 171                      | 92/93(171)                      | Hypothetical protein HMPREF9453_00882, <i>Dialister succinatiphilus</i> YIT 11850; ZP_09546713         |
| <i>Δtet(O)</i>   | 1362      | 39.4-39.7       | 639                      | 453                      | 97-99/98-99 (449)               | Tetracycline resistant protein, <i>Campylobacter jejuni</i> subsp. <i>jejuni</i> HB93-13; ZP_01072284  |
| <i>orf8</i>      | 375       | 33.9            | 178                      | 119                      | 55/70 (119)                     | Acetyltransferase, <i>Enterococcus casseliflavus</i> EC30; ZP_05646091                                 |
| <i>orf9</i>      | 426       | 31.2            | 133                      | 141                      | 65/81(133)                      | Fosfomycin resistance protein FosX, <i>Listeria monocytogenes</i> 10403S; YP_005962817                 |
| <i>orf10</i>     | 255       | 49.8            | 144                      | 84                       | 100/100 (84)                    | Unknown, <i>Trueperella pyogenes</i> ; ABF72143                                                        |
| <i>orf11</i>     | 546       | 39.2            | 181                      | 181                      | 99/99 (181)                     | Hypothetical protein, <i>Pediococcus acidilactici</i> ; YP_001965499                                   |
| <i>tet(O)</i>    | 1920      | 40.4            | 639                      | 639                      | 99/99 (639)                     | Tetracycline resistance protein, <i>Campylobacter coli</i> ; YP_063396                                 |
| <i>cpp2</i>      | 174       | 36.8            | 57                       | 57                       | 100/100 (57)                    | Unknown of pTet plasmid, <i>Campylobacter jejuni</i> subsp. <i>jejuni</i> 81-176; YP_063447            |
| <i>Δpnp</i>      | 225       | 40.4            | 256                      | 74                       | 100/100 (74)                    | Phosphorylase Pnp/Udp family protein, <i>Bacteroides</i> sp. 3_1_33FAA; ZP_06089331                    |
| <i>aad9</i>      | 777       | 35.8            | 258                      | 258                      | 100/100 (258)                   | Streptomycin 3'-adenylyltransferase, <i>Clostridium difficile</i> NAP08; ZP_06893323                   |
| <i>aspR</i>      | 312       | 37.2            | 72                       | 103                      | 100/100 (72)                    | Aspartate racemase, <i>Bacteroides</i> sp. 9_1_42FAA; ZP_04541310                                      |
| <i>orf12</i>     | 306       | 57.2            | 157                      | 101                      | 97/97(91)                       | Conserved hypothetical protein, <i>Bacteroides</i> sp. 1_1_14; ZP_06994823                             |
| <i>orf13</i>     | 273       | 53.1            | 267                      | 90                       | 100/100 (90)                    | Hypothetical protein HMPREF0490_02053, <i>Lachnospiraceae</i> bacterium 4_1_37FAA; ZP_08151313         |
| <i>cpp3</i>      | 549       | 46.1            | 182                      | 182                      | 100/100 (182)                   | Cpp3, recombination and DNA strand exchange inhibitor, <i>Campylobacter coli</i> LMG 9854; ZP_14129369 |

7 <sup>a</sup> Size of the ortholog protein. aa, amino acids.8 <sup>b</sup> Length of the peptides from the six types of MDRGIs.

9

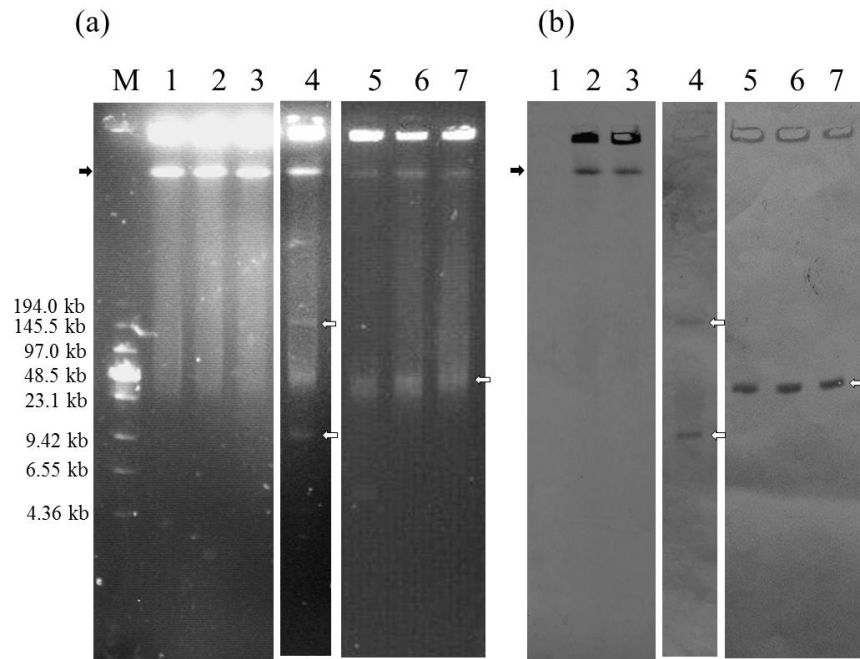

10

11 **FIG S1** Localization of *erm(B)* in *C. coli* by PFGE (a) and Southern hybridization (b).

12 *C. coli* ATCC33559 (lane 1), transformant g113 (lane 2), and representative *C. coli*

13 isolates including SH-CCD11C073 (Shanghai), 10-5-18 (Guangdong), JW16

14 (Ningxia), TH45 (Guangdong), DZB41 (Shandong) (lanes 3-7) are included in the

15 figure. Lane M contains Low Range PFG Marker (New England Biolabs, Beverly,

16 MA, USA). An *erm(B)*-specific probe was used for hybridization. ATCC33559 and

17 g113 are used as negative and positive controls, respectively. The figure is composed

18 of three different gels to show the chromosomal DNA and plasmids of various sizes

19 that hybridized to the *erm(B)* probe. The location of chromosomal DNA is indicated

20 by black arrows, while the locations of plasmids are indicated by white arrows.

21
